# Supplementary material for: Glycaemic control trends in people with type 1 diabetes in Scotland 2004–2016
Source: PubMed Central journal article supplement (PMC6647722; doi:10.1007/s00125-019-4900-7), 2019-05-18

ESM Table 1: Estimated fixed effect regression coefficient estimates for factors associated with HbA<sub>1c</sub>.

|                                  | <b>Estimate</b> | <b>Std. Error</b> | <b>t value</b> | <b>Pr(&gt; t )</b> |
|----------------------------------|-----------------|-------------------|----------------|--------------------|
| <b>(Intercept)</b>               | 67.7516         | 0.0047            | 899.2741       | <0.0001            |
| <b>Age at Onset</b>              | 10.9996         | 0.0001            | -4.4728        | <0.0001            |
| <b>Gender female</b>             | 1.0165          | 0.0021            | 7.6055         | <0.0001            |
| <b>Health board authority 1</b>  | 1.0278          | 0.0082            | 3.3396         | 0.0008             |
| <b>Health board authority 2</b>  | 1.0122          | 0.0057            | 2.1413         | 0.0322             |
| <b>Health board authority 3</b>  | 1.0146          | 0.0056            | 2.5942         | 0.0095             |
| <b>Health board authority 4</b>  | 1.0104          | 0.0048            | 2.1642         | 0.0305             |
| <b>Health board authority 5</b>  | 1.0188          | 0.0063            | 2.9495         | 0.0032             |
| <b>Health board authority 6</b>  | 1.0213          | 0.0049            | 4.3136         | <0.0001            |
| <b>Health board authority 7</b>  | 1.0691          | 0.0051            | 13.0195        | <0.0001            |
| <b>Health board authority 8</b>  | 0.9784          | 0.0174            | -1.2559        | 0.2091             |
| <b>Health board authority 9</b>  | 0.9947          | 0.0048            | -1.1022        | 0.2704             |
| <b>Health board authority 10</b> | 1.0295          | 0.0057            | 5.1017         | <0.0001            |
| <b>Health board authority 11</b> | 1.0434          | 0.0059            | 7.2128         | <0.0001            |
| <b>Health board authority 12</b> | 1.0119          | 0.0142            | 0.8383         | 0.4019             |
| <b>Health board authority 13</b> | 1.0132          | 0.0072            | 1.8365         | 0.0663             |
| <b>Health board authority 14</b> | 0.9691          | 0.0164            | -1.9131        | 0.0557             |
| <b>SIMD 2</b>                    | 0.9665          | 0.0034            | -10.0977       | <0.0001            |
| <b>SIMD 3</b>                    | 0.9813          | 0.0033            | -5.6549        | <0.0001            |
| <b>SIMD 4</b>                    | 0.9797          | 0.0034            | -6.0889        | <0.0001            |
| <b>SIMD 5</b>                    | 0.9662          | 0.0035            | -9.7589        | <0.0001            |
| <b>Age band 13-18</b>            | 1.0595          | 0.0019            | 31.1203        | <0.0001            |
| <b>Age band 19-24</b>            | 1.0564          | 0.0024            | 22.7262        | <0.0001            |
| <b>Age band 25-44</b>            | 1.0139          | 0.0027            | 5.1816         | <0.0001            |
| <b>Age band 45-64</b>            | 1.0146          | 0.0029            | 5.0369         | <0.0001            |
| <b>Age band ≥65</b>              | 0.9913          | 0.0035            | -2.5177        | 0.0118             |

Note: Health board authority was separated in fourteen dummy variables. In this table, Gender female shows females in comparison to males. Age band 13-18, Age band 19-24, Age band 25-44, Age band 45-64, Age band >64 are dummy variables with children (age band <13) set as the baseline category. SIMD 2, SIMD 3, SIMD 4 and SIMD 5 are dummy variables with SIMD 1 set as the baseline category

ESM Table 2: The distribution of HbA<sub>1c</sub> levels among people with type 1 diabetes in Scotland by year between 2004 and 2016 by age group.

| Age Group |                        | 2004      | 2005      | 2006      | 2007      | 2008      | 2009      | 2010      | 2011      | 2012      | 2013      | 2014      | 2015      | 2016      |
|-----------|------------------------|-----------|-----------|-----------|-----------|-----------|-----------|-----------|-----------|-----------|-----------|-----------|-----------|-----------|
| Age <13   | Median (IQR) Mmol/mol  | 69 (17)   | 68 (16)   | 69 (16)   | 69 (15)   | 69 (15)   | 70 (16)   | 69 (16)   | 69 (16)   | 69 (16)   | 66 (17)   | 64 (16)   | 63 (15)   | 63 (14)   |
|           | Median (IQR) %         | 8.5 (3.7) | 8.4 (3.6) | 8.5 (3.6) | 8.5 (3.5) | 8.5 (3.5) | 8.6 (3.6) | 8.5 (3.6) | 8.5 (3.6) | 8.5 (3.6) | 8.2 (3.7) | 8 (3.6)   | 7.9 (3.5) | 7.9 (3.4) |
|           | >48mmol/mol (%) (6.5%) | 97        | 97        | 98        | 98        | 98        | 97        | 98        | 98        | 97        | 95        | 95        | 94        | 97        |
|           | >53mmol/mol (%) (7%)   | 92        | 92        | 94        | 94        | 95        | 94        | 93        | 93        | 93        | 89        | 86        | 86        | 89        |
|           | >58mmol/mol (%) (7.5%) | 84        | 82        | 84        | 84        | 87        | 86        | 85        | 85        | 83        | 78        | 73        | 71        | 74        |
|           | >64mmol/mol (%) (8%)   | 69        | 68        | 70        | 69        | 72        | 73        | 71        | 69        | 67        | 60        | 53        | 49        | 50        |
|           | >75mmol/mol (%) (9%)   | 37        | 31        | 35        | 33        | 35        | 39        | 35        | 34        | 32        | 26        | 21        | 17        | 16        |
|           | >86mmol/mol (%) (10%)  | 15        | 12        | 14        | 14        | 12        | 14        | 12        | 12        | 11        | 8         | 7         | 6         | 4         |
|           | N                      | 1180      | 1188      | 1203      | 1184      | 1185      | 1205      | 1205      | 1208      | 1117      | 1258      | 1426      | 1355      | 1120      |
| Age 13-18 | Median (IQR)           | 77 (24)   | 77 (26)   | 77 (26)   | 77 (26)   | 76 (25.5) | 77 (26)   | 76 (26)   | 76 (26)   | 75 (25)   | 74 (25)   | 71 (25)   | 70 (25)   | 70 (23)   |
|           | Median (IQR) %         | 9.2 (4.3) | 9.2 (4.5) | 9.2 (4.5) | 9.2 (4.5) | 9.1 (4.4) | 9.2 (4.5) | 9.1 (4.5) | 9.1 (4.5) | 9 (4.4)   | 8.9 (4.4) | 8.6 (4.4) | 8.6 (4.4) | 8.6 (4.3) |
|           | >48mmol/mol (%) (6.5%) | 97        | 98        | 98        | 98        | 97        | 98        | 97        | 98        | 97        | 96        | 95        | 95        | 96        |
|           | >53mmol/mol (%) (7%)   | 94        | 95        | 95        | 94        | 95        | 94        | 94        | 94        | 94        | 92        | 90        | 90        | 92        |
|           | >58mmol/mol (%) (7.5%) | 89        | 89        | 90        | 89        | 88        | 89        | 88        | 88        | 87        | 85        | 81        | 81        | 83        |
|           | >64mmol/mol (%) (8%)   | 81        | 80        | 80        | 80        | 79        | 79        | 79        | 78        | 77        | 73        | 68        | 67        | 68        |
|           | >75mmol/mol (%) (9%)   | 56        | 56        | 56        | 56        | 55        | 55        | 54        | 53        | 51        | 48        | 43        | 41        | 42        |
|           | >86mmol/mol (%) (10%)  | 33        | 34        | 35        | 36        | 33        | 34        | 33        | 33        | 30        | 29        | 25        | 24        | 23        |
|           | N                      | 1710      | 1795      | 1805      | 1812      | 1817      | 1817      | 1897      | 1888      | 1800      | 1945      | 2081      | 1982      | 1605      |
| Age 19-24 | Median (IQR)           | 73.5 (25) | 74 (24)   | 75 (27)   | 75 (26)   | 75 (27)   | 75 (27)   | 76 (28)   | 76 (29)   | 79 (30)   | 76 (28)   | 75 (30)   | 75 (28)   | 73 (27)   |

| Age Group                 | 2004      | 2005      | 2006      | 2007      | 2008      | 2009      | 2010      | 2011      | 2012      | 2013      | 2014      | 2015      | 2016      |
|---------------------------|-----------|-----------|-----------|-----------|-----------|-----------|-----------|-----------|-----------|-----------|-----------|-----------|-----------|
| Median (IQR) %            | 8.9 (4.4) | 8.9 (4.3) | 9 (4.6)   | 9 (4.5)   | 9 (4.6)   | 9 (4.6)   | 9.1 (4.7) | 9.1 (4.8) | 9.4 (4.9) | 9.1 (4.7) | 9 (4.9)   | 9 (4.7)   | 8.8 (4.6) |
| >48mmol/mol (%) (6.5%)    | 94        | 95        | 96        | 96        | 96        | 96        | 96        | 97        | 97        | 96        | 96        | 96        | 95        |
| >53mmol/mol (%) (7%)      | 89        | 91        | 91        | 92        | 93        | 92        | 92        | 92        | 93        | 92        | 91        | 91        | 91        |
| >58mmol/mol (%) (7.5%)    | 82        | 84        | 84        | 85        | 86        | 85        | 85        | 86        | 88        | 86        | 84        | 84        | 84        |
| >64mmol/mol (%) (8%)      | 72        | 74        | 74        | 75        | 76        | 75        | 76        | 77        | 79        | 77        | 73        | 73        | 71        |
| >75mmol/mol (%) (9%)      | 47        | 49        | 51        | 52        | 51        | 51        | 53        | 54        | 58        | 54        | 51        | 50        | 48        |
| >86mmol/mol (%) (10%)     | 27        | 28        | 31        | 32        | 31        | 33        | 34        | 35        | 38        | 34        | 33        | 32        | 29        |
| N                         | 1699      | 1859      | 1895      | 1963      | 2056      | 2057      | 2183      | 2177      | 2167      | 2131      | 2220      | 2138      | 1550      |
| Age 25-44<br>Median (IQR) | 70 (22)   | 70 (22)   | 70 (23)   | 69 (23)   | 69 (21)   | 69 (21)   | 69 (21.2) | 70 (23)   | 71 (23)   | 69 (23)   | 68 (24)   | 68 (24)   | 68 (23)   |
| Median (IQR) %            | 8.6 (4.2) | 8.6 (4.2) | 8.6 (4.3) | 8.5 (4.3) | 8.5 (4.1) | 8.5 (4.1) | 8.5 (4.1) | 8.6 (4.3) | 8.6 (4.3) | 8.5 (4.3) | 8.4 (4.3) | 8.4 (4.3) | 8.4 (4.3) |
| >48mmol/mol (%) (6.5%)    | 95        | 96        | 95        | 94        | 94        | 94        | 94        | 95        | 95        | 95        | 93        | 93        | 93        |
| >53mmol/mol (%) (7%)      | 90        | 90        | 89        | 88        | 88        | 88        | 88        | 89        | 90        | 89        | 86        | 86        | 86        |
| >58mmol/mol (%) (7.5%)    | 80        | 81        | 80        | 78        | 78        | 78        | 78        | 79        | 81        | 79        | 75        | 76        | 76        |
| >64mmol/mol (%) (8%)      | 68        | 69        | 67        | 66        | 65        | 65        | 65        | 67        | 69        | 65        | 62        | 62        | 62        |
| >75mmol/mol (%) (9%)      | 41        | 42        | 40        | 39        | 39        | 38        | 39        | 40        | 43        | 40        | 37        | 37        | 37        |
| >86mmol/mol (%) (10%)     | 20        | 21        | 20        | 20        | 20        | 20        | 20        | 22        | 23        | 22        | 20        | 20        | 20        |
| N                         | 7831      | 8121      | 8183      | 8070      | 8258      | 8174      | 8236      | 8048      | 7870      | 7806      | 7946      | 7786      | 5997      |
| Age 45-64<br>Median (IQR) | 70 (19)   | 70 (19)   | 70 (19)   | 69 (19)   | 69 (19)   | 69 (19)   | 69 (19)   | 70 (20)   | 71 (20)   | 69 (19)   | 69 (20)   | 69 (20)   | 69 (19)   |
| >48mmol/mol (%) (6.5%)    | 96        | 96        | 96        | 95        | 95        | 96        | 96        | 96        | 97        | 96        | 95        | 95        | 95        |
| >53mmol/mol (%) (7%)      | 91        | 91        | 91        | 90        | 90        | 90        | 91        | 91        | 92        | 91        | 89        | 90        | 90        |
| >58mmol/mol (%) (7.5%)    | 82        | 82        | 81        | 81        | 80        | 81        | 81        | 82        | 84        | 82        | 80        | 81        | 81        |

| Age Group              | 2004      | 2005      | 2006      | 2007    | 2008    | 2009    | 2010    | 2011    | 2012      | 2013      | 2014      | 2015      | 2016      |
|------------------------|-----------|-----------|-----------|---------|---------|---------|---------|---------|-----------|-----------|-----------|-----------|-----------|
| >64mmol/mol (%) (8%)   | 70        | 70        | 68        | 68      | 67      | 67      | 67      | 69      | 71        | 67        | 65        | 67        | 66        |
| >75mmol/mol (%) (9%)   | 40        | 40        | 39        | 38      | 37      | 37      | 37      | 39      | 40        | 38        | 36        | 38        | 37        |
| >86mmol/mol (%) (10%)  | 18        | 19        | 18        | 17      | 16      | 17      | 17      | 19      | 19        | 18        | 17        | 18        | 17        |
| N                      | 5684      | 6171      | 6535      | 6784    | 7167    | 7428    | 7671    | 7888    | 8022      | 8216      | 8485      | 8521      | 7006      |
| Age >64                |           |           |           |         |         |         |         |         |           |           |           |           |           |
| Median (IQR)           | 69 (19)   | 69 (18)   | 68 (21)   | 67 (20) | 66 (20) | 66 (20) | 67 (20) | 68 (20) | 68 (18)   | 67 (19)   | 66 (19)   | 66 (18)   | 67 (19)   |
| Median (IQR) %         | 8.5 (3.9) | 8.5 (3.8) | 8.4 (4.1) | 8.3 (4) | 8.2 (4) | 8.2 (4) | 8.3 (4) | 8.4 (4) | 8.4 (3.8) | 8.3 (3.9) | 8.2 (3.9) | 8.2 (3.8) | 8.3 (3.9) |
| >48mmol/mol (%) (6.5%) | 95        | 95        | 95        | 94      | 94      | 93      | 94      | 95      | 95        | 95        | 94        | 94        | 95        |
| >53mmol/mol (%) (7%)   | 89        | 89        | 89        | 87      | 86      | 86      | 86      | 88      | 89        | 88        | 86        | 87        | 88        |
| >58mmol/mol (%) (7.5%) | 79        | 79        | 78        | 76      | 74      | 74      | 74      | 76      | 80        | 76        | 74        | 75        | 76        |
| >64mmol/mol (%) (8%)   | 66        | 66        | 63        | 62      | 59      | 59      | 60      | 62      | 63        | 61        | 57        | 59        | 61        |
| >75mmol/mol (%) (9%)   | 37        | 35        | 35        | 33      | 30      | 30      | 30      | 33      | 33        | 31        | 28        | 29        | 30        |
| >86mmol/mol (%) (10%)  | 16        | 14        | 14        | 13      | 13      | 12      | 13      | 13      | 13        | 12        | 11        | 12        | 12        |
| N                      | 1836      | 2049      | 2160      | 2197    | 2225    | 2272    | 2315    | 2404    | 2530      | 2669      | 2787      | 2837      | 2393      |

People are included for all the age bands they inhabited within any calendar year. Since a small number from one age band to another within a given calendar year, they contribute to both age bands and are thus counted in the N for each of those age bands.

ESM Table 3: The distribution of HbA<sub>1c</sub> levels between 2004 and 2016 by sex

| Gender |                        | 2004      | 2005      | 2006      | 2007      | 2008      | 2009      | 2010      | 2011      | 2012      | 2013      | 2014      | 2015      | 2016      |
|--------|------------------------|-----------|-----------|-----------|-----------|-----------|-----------|-----------|-----------|-----------|-----------|-----------|-----------|-----------|
| Male   | Median (IQR) mmol/mol  | 70 (20)   | 70 (20)   | 70 (20)   | 69 (20)   | 69 (21)   | 69 (20)   | 69 (20)   | 70 (20)   | 70 (22)   | 69 (21)   | 68 (21)   | 68 (21)   | 68 (20)   |
|        | Median (IQR) %         | 8.6 (4)   | 8.6 (4)   | 8.6 (4)   | 8.5 (4)   | 8.5 (4.1) | 8.5 (4)   | 8.5 (4)   | 8.6 (4)   | 8.6 (4.2) | 8.5 (4.1) | 8.4 (4.1) | 8.4 (4.1) | 8.4 (4)   |
|        | >48mmol/mol (%) (6.5%) | 96        | 96        | 96        | 95        | 95        | 95        | 95        | 96        | 96        | 95        | 95        | 95        | 95        |
|        | >53mmol/mol (%) (7%)   | 90        | 91        | 90        | 89        | 89        | 89        | 90        | 90        | 91        | 90        | 88        | 89        | 89        |
|        | >58mmol/mol (%) (7.5%) | 81        | 82        | 81        | 80        | 79        | 80        | 80        | 81        | 83        | 80        | 78        | 79        | 79        |
|        | >64mmol/mol (%) (8%)   | 69        | 69        | 68        | 67        | 67        | 67        | 67        | 68        | 69        | 66        | 63        | 64        | 63        |
|        | >75mmol/mol (%) (9%)   | 40        | 40        | 40        | 39        | 39        | 38        | 38        | 40        | 41        | 38        | 35        | 35        | 35        |
|        | >86mmol/mol (%) (10%)  | 19        | 20        | 20        | 19        | 19        | 19        | 19        | 20        | 21        | 19        | 18        | 17        | 17        |
|        | N                      | 10644     | 11354     | 11699     | 11821     | 12223     | 12345     | 12628     | 12658     | 12619     | 12896     | 13336     | 13122     | 10511     |
| Female | Median (IQR) mmol/mol  | 72 (22)   | 72 (22)   | 72 (21)   | 70 (23)   | 70 (22)   | 70 (22)   | 70 (22)   | 72 (22)   | 72 (22)   | 70 (22)   | 68 (23)   | 69 (22)   | 69 (22)   |
|        | Median (IQR) %         | 8.7 (4.2) | 8.7 (4.2) | 8.7 (4.1) | 8.6 (4.3) | 8.6 (4.2) | 8.6 (4.2) | 8.6 (4.2) | 8.7 (4.2) | 8.7 (4.2) | 8.6 (4.2) | 8.4 (4.3) | 8.5 (4.2) | 8.5 (4.2) |
|        | >48mmol/mol (%) (6.5%) | 96        | 96        | 96        | 96        | 96        | 96        | 96        | 96        | 96        | 95        | 94        | 94        | 95        |
|        | >53mmol/mol (%) (7%)   | 90        | 91        | 91        | 90        | 90        | 90        | 90        | 91        | 91        | 90        | 87        | 88        | 88        |
|        | >58mmol/mol (%) (7.5%) | 82        | 83        | 82        | 82        | 81        | 81        | 81        | 82        | 84        | 81        | 77        | 78        | 79        |
|        | >64mmol/mol (%) (8%)   | 71        | 71        | 70        | 69        | 69        | 69        | 69        | 70        | 71        | 68        | 63        | 63        | 64        |
|        | >75mmol/mol (%) (9%)   | 44        | 44        | 43        | 42        | 41        | 41        | 42        | 43        | 44        | 40        | 37        | 37        | 37        |
|        | >86mmol/mol (%) (10%)  | 22        | 22        | 22        | 22        | 21        | 21        | 21        | 23        | 23        | 21        | 19        | 20        | 19        |
|        | N                      | 8805      | 9254      | 9478      | 9598      | 9869      | 10000     | 10221     | 10327     | 10273     | 10556     | 10884     | 10862     | 9010      |

ESM Table 4: The distribution of HbA<sub>1c</sub> levels between 2004 and 2016 by SIMD quintile

| SIMD                      |                           | 2004                  | 2005      | 2006      | 2007      | 2008      | 2009      | 2010      | 2011      | 2012      | 2013      | 2014      | 2015      | 2016      |         |
|---------------------------|---------------------------|-----------------------|-----------|-----------|-----------|-----------|-----------|-----------|-----------|-----------|-----------|-----------|-----------|-----------|---------|
| SIMD 1                    | Median (IQR) mmol/mol     | 75 (24)               | 75 (24)   | 75 (23)   | 74 (24)   | 74 (23)   | 74 (24)   | 74 (24)   | 74 (24)   | 75 (24)   | 74 (25)   | 73 (25)   | 73 (24)   | 73 (24)   |         |
|                           | Median (IQR) %            | 9 (4.3)               | 9 (4.3)   | 9 (4.3)   | 8.9 (4.3) | 8.9 (4.3) | 8.9 (4.3) | 8.9 (4.3) | 8.9 (4.3) | 9 (4.3)   | 8.9 (4.4) | 8.8 (4.4) | 8.8 (4.3) | 8.8 (4.3) |         |
|                           | >48mmol/mol (%)<br>(6.5%) | 96                    | 97        | 96        | 96        | 96        | 96        | 96        | 96        | 97        | 97        | 96        | 95        | 96        | 96      |
|                           | >53mmol/mol (%)<br>(7%)   | 92                    | 93        | 92        | 91        | 91        | 91        | 92        | 93        | 93        | 92        | 92        | 90        | 91        | 91      |
|                           | >58mmol/mol (%)<br>(7.5%) | 85                    | 86        | 85        | 84        | 84        | 83        | 84        | 86        | 87        | 84        | 82        | 83        | 83        |         |
|                           | >64mmol/mol (%)<br>(8%)   | 75                    | 76        | 75        | 75        | 74        | 73        | 73        | 75        | 76        | 73        | 70        | 72        | 72        |         |
|                           | >75mmol/mol (%)<br>(9%)   | 51                    | 50        | 51        | 49        | 49        | 48        | 49        | 50        | 51        | 48        | 46        | 46        | 46        |         |
|                           | >86mmol/mol (%)<br>(10%)  | 28                    | 29        | 28        | 28        | 27        | 26        | 27        | 29        | 30        | 28        | 25        | 26        | 26        |         |
|                           | N                         | 3806                  | 4030      | 4162      | 4225      | 4355      | 4357      | 4483      | 4520      | 4485      | 4517      | 4705      | 4653      | 3687      |         |
|                           | SIMD 2                    | Median (IQR) mmol/mol | 73 (21)   | 72 (22)   | 72 (22)   | 72 (22)   | 72 (22)   | 72 (23)   | 72 (22)   | 72 (23)   | 73 (22)   | 71 (22)   | 70 (22)   | 70 (23)   | 70 (21) |
| Median (IQR) %            |                           | 8.8 (4.1)             | 8.7 (4.2) | 8.7 (4.2) | 8.7 (4.2) | 8.7 (4.2) | 8.7 (4.3) | 8.7 (4.2) | 8.7 (4.3) | 8.8 (4.2) | 8.6 (4.2) | 8.6 (4.2) | 8.6 (4.3) | 8.6 (4.1) |         |
| >48mmol/mol (%)<br>(6.5%) |                           | 96                    | 97        | 96        | 96        | 96        | 95        | 95        | 96        | 96        | 95        | 95        | 95        | 95        |         |
| >53mmol/mol (%)<br>(7%)   |                           | 90                    | 92        | 91        | 91        | 91        | 91        | 90        | 91        | 92        | 90        | 89        | 89        | 90        |         |
| >58mmol/mol (%)<br>(7.5%) |                           | 83                    | 84        | 83        | 82        | 82        | 83        | 82        | 82        | 85        | 82        | 79        | 80        | 82        |         |
| >64mmol/mol (%)<br>(8%)   |                           | 73                    | 72        | 71        | 71        | 71        | 72        | 70        | 71        | 73        | 69        | 67        | 67        | 68        |         |
| >75mmol/mol (%)<br>(9%)   |                           | 45                    | 44        | 45        | 44        | 43        | 44        | 43        | 44        | 45        | 42        | 39        | 40        | 39        |         |
| >86mmol/mol (%)<br>(10%)  |                           | 23                    | 22        | 23        | 23        | 22        | 24        | 23        | 23        | 24        | 22        | 20        | 21        | 20        |         |
| N                         |                           | 4040                  | 4218      | 4354      | 4372      | 4494      | 4549      | 4648      | 4669      | 4672      | 4766      | 4897      | 4859      | 3904      |         |
| SIMD 3                    |                           | Median (IQR) mmol/mol | 72 (21)   | 72 (21)   | 70 (19)   | 70 (22)   | 70 (20)   | 69 (20)   | 70 (20)   | 70 (22)   | 72 (22)   | 70 (21)   | 69 (22)   | 68 (21)   | 69 (20) |
|                           | Median (IQR) %            | 8.7 (4.1)             | 8.7 (4.1) | 8.6 (3.9) | 8.6 (4.2) | 8.6 (4)   | 8.5 (4)   | 8.6 (4)   | 8.6 (4.2) | 8.7 (4.2) | 8.6 (4.1) | 8.5 (4.2) | 8.4 (4.1) | 8.5 (4)   |         |
|                           | >48mmol/mol (%)<br>(6.5%) | 96                    | 96        | 96        | 96        | 96        | 95        | 96        | 96        | 97        | 96        | 95        | 95        | 95        |         |
|                           | >53mmol/mol (%)<br>(7%)   | 91                    | 92        | 91        | 91        | 90        | 90        | 91        | 91        | 92        | 90        | 89        | 89        | 90        |         |
|                           | >58mmol/mol (%)<br>(7.5%) | 83                    | 84        | 83        | 82        | 80        | 82        | 81        | 82        | 84        | 82        | 78        | 79        | 80        |         |
|                           | >64mmol/mol (%)<br>(8%)   | 71                    | 72        | 70        | 68        | 67        | 68        | 69        | 69        | 71        | 67        | 63        | 63        | 64        |         |

| <b>SIMD</b> |                        | <b>2004</b> | <b>2005</b> | <b>2006</b> | <b>2007</b> | <b>2008</b> | <b>2009</b> | <b>2010</b> | <b>2011</b> | <b>2012</b> | <b>2013</b> | <b>2014</b> | <b>2015</b> | <b>2016</b> |
|-------------|------------------------|-------------|-------------|-------------|-------------|-------------|-------------|-------------|-------------|-------------|-------------|-------------|-------------|-------------|
| SIMD 4      | >75mmol/mol (%) (9%)   | 42          | 42          | 41          | 40          | 40          | 39          | 39          | 42          | 43          | 39          | 37          | 35          | 36          |
|             | >86mmol/mol (%) (10%)  | 20          | 20          | 20          | 20          | 20          | 20          | 19          | 21          | 22          | 20          | 19          | 18          | 18          |
|             | N                      | 4078        | 4358        | 4467        | 4514        | 4662        | 4742        | 4831        | 4814        | 4774        | 4915        | 5063        | 5015        | 4100        |
|             | Median (IQR) mmol/mol  | 69 (19)     | 69 (19)     | 69 (19)     | 69 (20)     | 68 (19)     | 68 (19)     | 68.5 (20)   | 69 (19)     | 70 (20)     | 69 (20)     | 67 (20)     | 67 (20)     | 67 (20)     |
|             | Median (IQR) %         | 8.5 (3.9)   | 8.5 (3.9)   | 8.5 (3.9)   | 8.5 (4)     | 8.4 (3.9)   | 8.4 (3.9)   | 8.5 (4)     | 8.5 (3.9)   | 8.6 (4)     | 8.5 (4)     | 8.3 (4)     | 8.3 (4)     | 8.3 (4)     |
|             | >48mmol/mol (%) (6.5%) | 96          | 96          | 96          | 95          | 96          | 96          | 95          | 96          | 96          | 96          | 95          | 94          | 94          |
|             | >53mmol/mol (%) (7%)   | 90          | 90          | 90          | 89          | 90          | 89          | 89          | 91          | 91          | 90          | 88          | 87          | 87          |
|             | >58mmol/mol (%) (7.5%) | 81          | 81          | 80          | 79          | 79          | 79          | 79          | 80          | 82          | 80          | 77          | 76          | 76          |
|             | >64mmol/mol (%) (8%)   | 68          | 68          | 67          | 65          | 65          | 65          | 65          | 67          | 68          | 65          | 61          | 60          | 61          |
|             | >75mmol/mol (%) (9%)   | 39          | 38          | 37          | 37          | 36          | 35          | 36          | 38          | 39          | 36          | 33          | 33          | 32          |
| SIMD 5      | >86mmol/mol (%) (10%)  | 18          | 17          | 18          | 17          | 17          | 16          | 17          | 18          | 18          | 17          | 15          | 15          | 14          |
|             | N                      | 3927        | 4156        | 4292        | 4305        | 4455        | 4542        | 4640        | 4665        | 4687        | 4792        | 4955        | 4946        | 4042        |
|             | Median (IQR) mmol/mol  | 68 (20)     | 68 (20)     | 67 (20)     | 67 (20)     | 67 (19)     | 67 (19)     | 67 (20)     | 67 (20)     | 67 (19)     | 66 (19)     | 65 (19)     | 65 (19)     | 65 (18)     |
|             | Median (IQR) %         | 8.4 (4)     | 8.4 (4)     | 8.3 (4)     | 8.3 (4)     | 8.3 (3.9)   | 8.3 (3.9)   | 8.3 (4)     | 8.3 (4)     | 8.3 (3.9)   | 8.2 (3.9)   | 8.1 (3.9)   | 8.1 (3.9)   | 8.1 (3.8)   |
|             | >48mmol/mol (%) (6.5%) | 94          | 95          | 94          | 94          | 93          | 94          | 95          | 95          | 95          | 94          | 92          | 93          | 93          |
|             | >53mmol/mol (%) (7%)   | 88          | 88          | 88          | 87          | 86          | 87          | 87          | 88          | 89          | 87          | 84          | 85          | 85          |
|             | >58mmol/mol (%) (7.5%) | 77          | 77          | 76          | 76          | 75          | 75          | 76          | 76          | 78          | 75          | 72          | 72          | 72          |
|             | >64mmol/mol (%) (8%)   | 63          | 63          | 62          | 61          | 61          | 60          | 61          | 62          | 62          | 58          | 54          | 55          | 53          |
|             | >75mmol/mol (%) (9%)   | 33          | 33          | 33          | 32          | 31          | 31          | 32          | 31          | 32          | 29          | 26          | 27          | 26          |
|             | >86mmol/mol (%) (10%)  | 14          | 15          | 14          | 14          | 14          | 13          | 14          | 15          | 14          | 13          | 12          | 12          | 11          |
| N           | 3598                   | 3846        | 3902        | 4003        | 4126        | 4155        | 4247        | 4317        | 4274        | 4462        | 4600        | 4511        | 3788        |             |

ESM Fig 1: Estimated proportion and 95% confidence intervals of people with type 1 diabetes in Scotland with good glycaemic control (a), stratified by age (b), sex (c) and SIMD quintile (where 1 is the most deprived quintile) (d). Good glycaemic control was defined as  $\leq 58\text{mmol/mol}$  in patients aged  $\leq 18$  years and  $53\text{mmol/mol}$  in patients aged  $>18$  years.

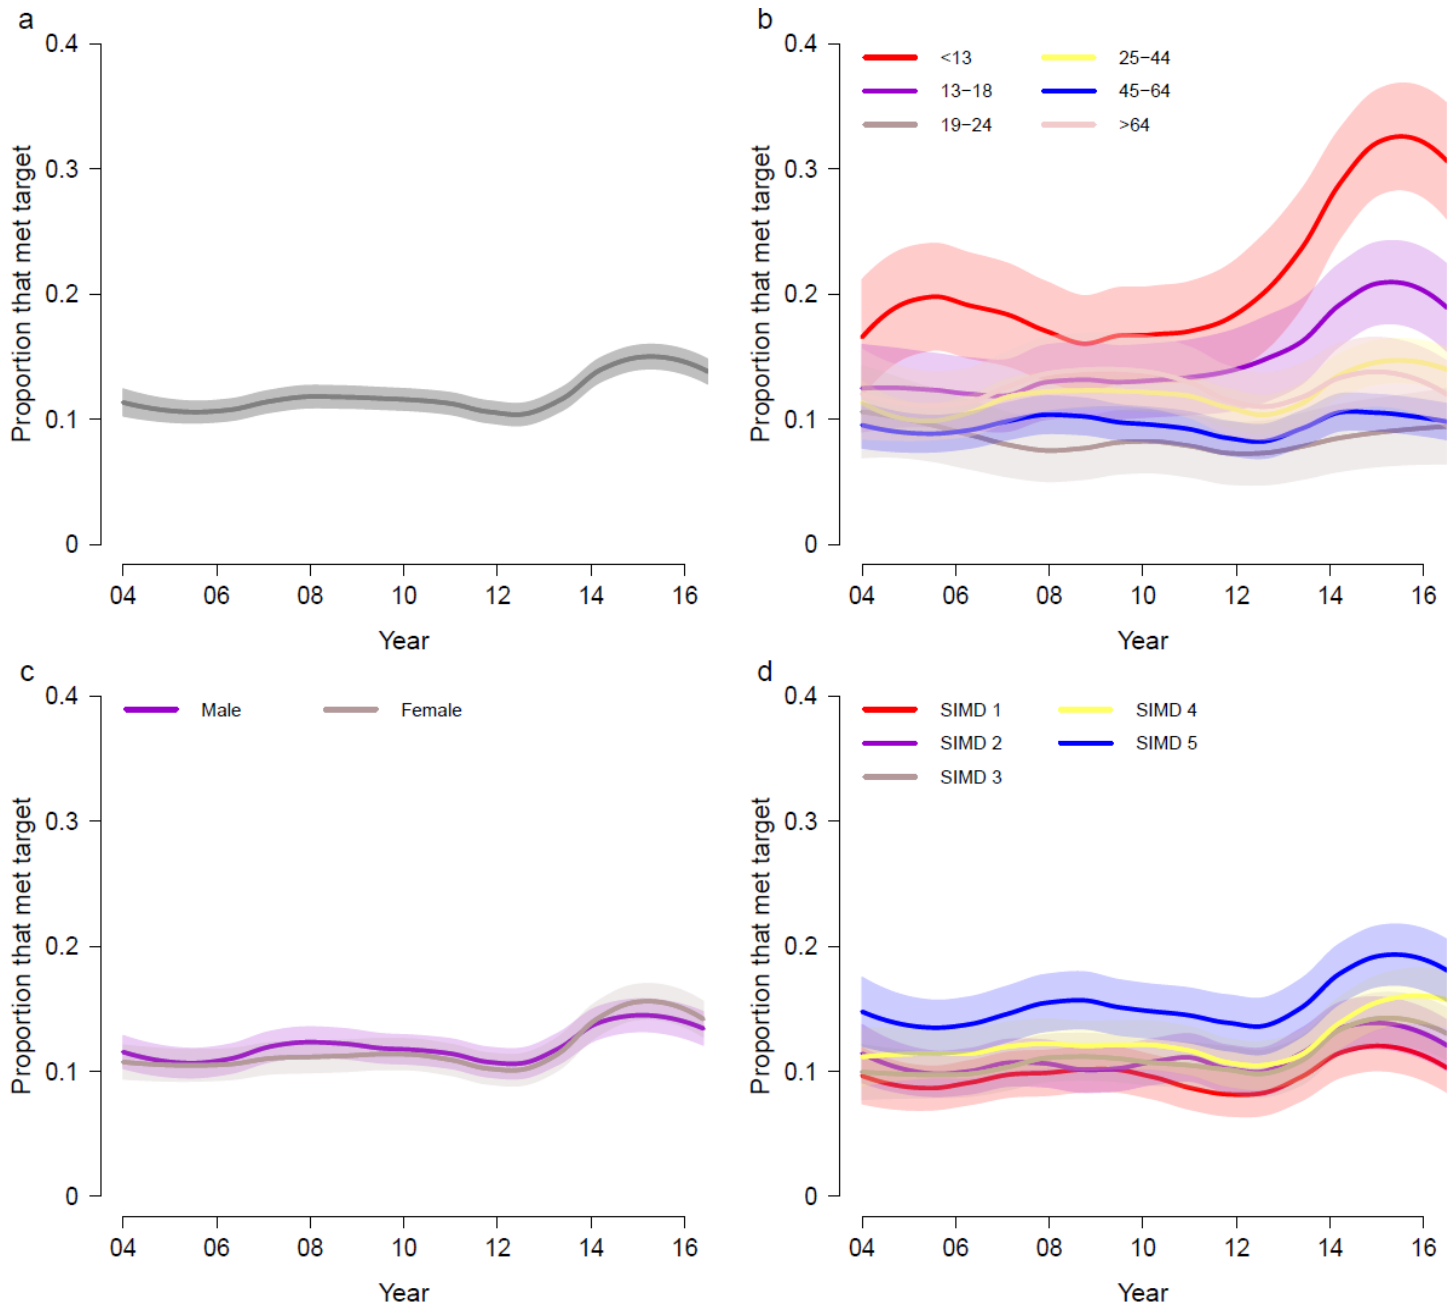



ESM Fig 2: Estimated proportion and 95% confidence intervals of people with type 1 diabetes in Scotland with good glycaemic control (a), stratified by age (b), sex (c) and SIMD quintile (where 1 is the most deprived quintile) (d). Good control was defined using NICE guidelines of 48mmol/mol.

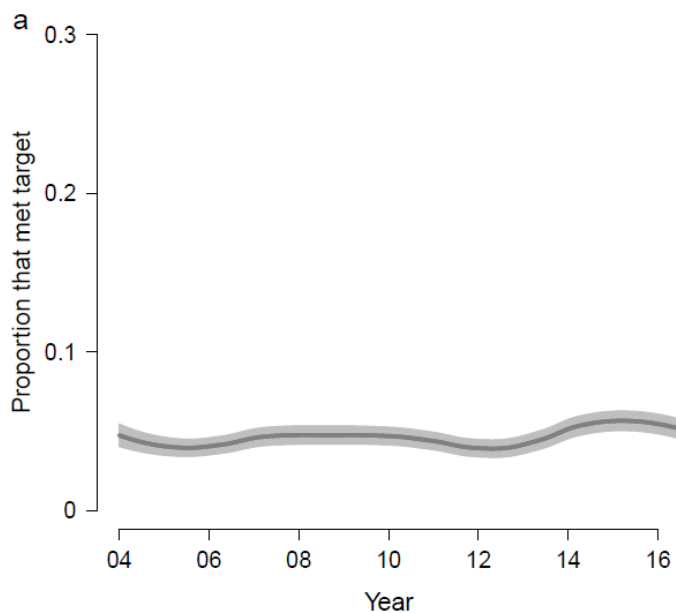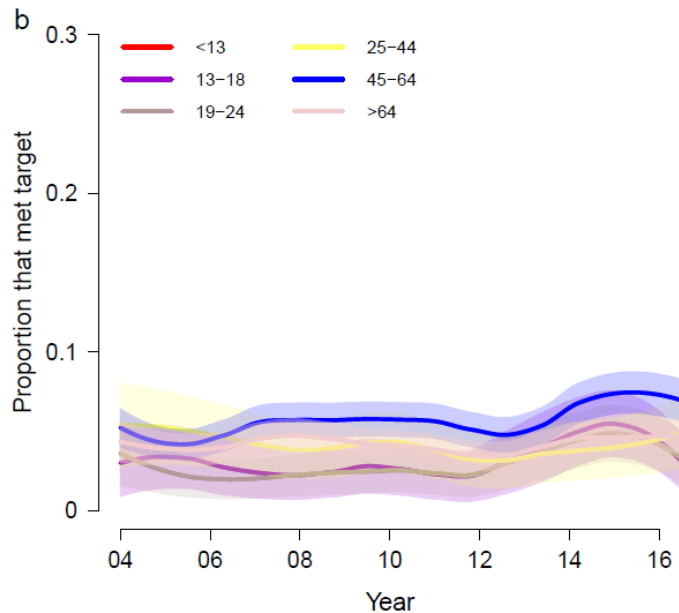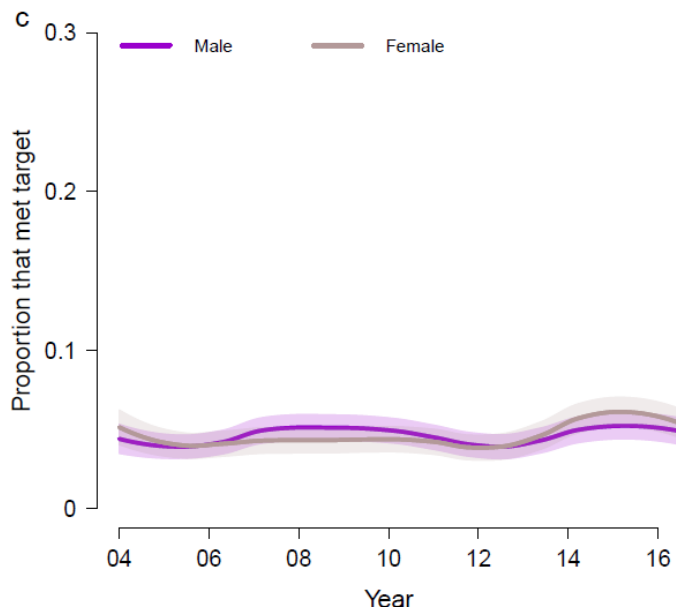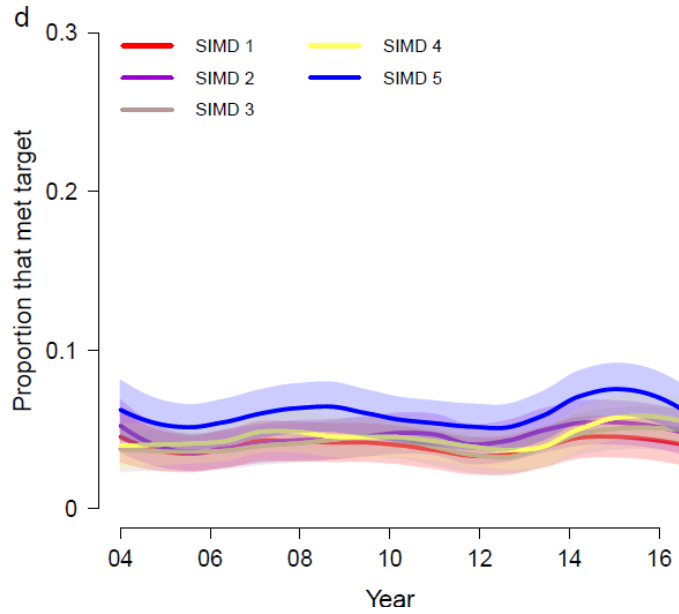

Supplement: 125_2019_4900_MOESM1_ESM.pdf [file 125_2019_4900_MOESM1_ESM.pdf]
